# Supplementary material for: Genomic Health Literacy Interventions in Pediatrics: Scoping Review
Source: PubMed Central journal article supplement (PMC8742210; doi:10.2196/26684), 2021-12-24
Supplement: jmir_v23i12e26684_app1.pdf [file jmir_v23i12e26684_app1.pdf]

**Figure 1.** Search Strategy

| MEDLINE                                                                                                                                                                                                                                                                                                   | EMBASE                                                                                                                                                                                                                                                                                                   | SCOPUS                                                                                                                                                                                                           | CINAHL                                                                                                                                                                                                                                                                                                                                                        |
|-----------------------------------------------------------------------------------------------------------------------------------------------------------------------------------------------------------------------------------------------------------------------------------------------------------|----------------------------------------------------------------------------------------------------------------------------------------------------------------------------------------------------------------------------------------------------------------------------------------------------------|------------------------------------------------------------------------------------------------------------------------------------------------------------------------------------------------------------------|---------------------------------------------------------------------------------------------------------------------------------------------------------------------------------------------------------------------------------------------------------------------------------------------------------------------------------------------------------------|
| <b>Concept 1: Pediatrics</b>                                                                                                                                                                                                                                                                              |                                                                                                                                                                                                                                                                                                          |                                                                                                                                                                                                                  |                                                                                                                                                                                                                                                                                                                                                               |
| 1. pediatric.mp. or exp Pediatrics/<br>2. paediatric*.tw,kf.<br><br>3. JIA.tw,kf.<br>4. ((pediatric or paediatric) adj5 illness).tw,kf.<br>5. "juvenile idiopathic arthritis".tw,kf.<br>6. ((young or adolescen* or child*) adj5 illness).tw,kf.<br>7. autoimmune disease.mp. or exp Autoimmune Diseases/ | 1. pediatric.mp. or exp pediatrics/<br>2. paediatric*.tw,kw.<br><br>3. JIA.tw,kw.<br>4. ((pediatric or paediatric) adj5 illness).tw,kw.<br>5. "juvenile idiopathic arthritis".tw,kw.<br>6. ((young or adolescen* or child*) adj5 illness).tw,kw.<br>7. autoimmune disease.mp. or exp autoimmune disease/ | TITLE-ABS-KEY<br>((pediatric*) OR (paediatric*) (JIA) OR ((pediatric or paediatric) w/5 illness) OR (“juvenile idiopathic arthritis”) OR ((young or adolescen* or child* w/5 illness) OR (“autoimmune disease”)) | (MH "Pediatrics+")<br><br>(MH "Autoimmune Diseases+")<br><br>( TI (paediatric*) OR ((paediatric or pediatric) n5 illness) OR (“juvenile idiopathic arthritis”) OR ((young or adolescen* or child* n5 illness)) OR ( AB ((pediatric n5 illness) OR (“juvenile idiopathic arthritis”) OR ((young or adolescen* or child* n5 illness))                           |
| <b>Concept 2: Patient education</b>                                                                                                                                                                                                                                                                       |                                                                                                                                                                                                                                                                                                          |                                                                                                                                                                                                                  |                                                                                                                                                                                                                                                                                                                                                               |
| 7. Patient education.mp. or exp Patient education as Topic/<br>8. ((patient or young or adolescen* or child*) adj5 (educat* or learn* or knowledge or literacy or info*)).tw,kf.<br>9. "health knowledge".tw,kf.                                                                                          | 7. Patient education.mp. or exp patient education/<br>8. ((patient or young or adolescen* or child*) adj5 (educat* or learn* or knowledge or literacy or info*)).tw,kw.<br>9. "health knowledge".tw,kw.                                                                                                  | TITLE-ABS-KEY<br>(“patient education”) OR ((patient or young or adolescen* or child*) w/5 (educat* or learn* or knowledge or literacy or info*)) or “health knowledge”)                                          | (MH "Patient Education+")<br><br>( TI (“patient education”) OR ((patient or young or adolescen* or child*) n5 (educat* or learn* or knowledge or literacy or info*)) or “health knowledge”) ) OR ( AB (“patient education”) OR ((patient or young or adolescen* or child*) n5 (educat* or learn* or knowledge or literacy or info*)) or “health knowledge”) ) |
| <b>Concept 3: Genomics</b>                                                                                                                                                                                                                                                                                |                                                                                                                                                                                                                                                                                                          |                                                                                                                                                                                                                  |                                                                                                                                                                                                                                                                                                                                                               |
| 10. exp Genomics/                                                                                                                                                                                                                                                                                         | 10. exp Genomics/                                                                                                                                                                                                                                                                                        | TITLE-ABS-KEY((genetic* or                                                                                                                                                                                       | (MH "Genomics+")                                                                                                                                                                                                                                                                                                                                              |

|                                                                                                                                                                                                                                   |                                                                                                                                                                                                                                                             |                                                                                                                                                                  |                                                                                                                                                                                                                                                                                                                                                                                                                 |
|-----------------------------------------------------------------------------------------------------------------------------------------------------------------------------------------------------------------------------------|-------------------------------------------------------------------------------------------------------------------------------------------------------------------------------------------------------------------------------------------------------------|------------------------------------------------------------------------------------------------------------------------------------------------------------------|-----------------------------------------------------------------------------------------------------------------------------------------------------------------------------------------------------------------------------------------------------------------------------------------------------------------------------------------------------------------------------------------------------------------|
| <p>11. (genetic* or genomic* or genom* or biologic*).tw,kf.<br/> 12. exp Genetic Counseling/<br/> 13. (genetic adj5 (counselling or counseling)).tw,kf.<br/> 14. "genetic testing".tw,kf.<br/> 15. "genom* sequencing".tw,kf.</p> | <p>11. (genetic* or genomic* or genom* or biologic*).tw,kw.<br/> 12. genetic counselling.mp. or exp genetic counseling/<br/> 13. (genetic adj5 (counselling or counseling)).tw,kw.<br/> 14. "genetic testing".tw,kw.<br/> 15. "genom* sequencing".tw,kw</p> | <p>genomic* or genom* or biologic*) or ("genetic counselling") or ("genetic w/5 counselling or counseling") or ("genetic testing") or ("genom* sequencing"))</p> | <p>(MH "Genetic Counseling")<br/> <br/> ( TI ((genetic* or genomic* or genom* or biologic*) or ("genetic counselling") or ("genetic n5 counselling or counseling") or ("genetic testing") or ("genom* sequencing"))) ) OR ( AB (((genetic* or genomic* or genom* or biologic*) or ("genetic counselling") or ("genetic n5 counselling or counseling") or ("genetic testing") or ("genom* sequencing"))) ) )</p> |
| <b>Combos + Limits</b>                                                                                                                                                                                                            |                                                                                                                                                                                                                                                             |                                                                                                                                                                  |                                                                                                                                                                                                                                                                                                                                                                                                                 |
| <p>16. 1 or 2 or 3 or 4 or 5 or<br/> 17. 7 or 8 or 9<br/> 18. 10 or 11 or 12 or 13 or 14 or 15<br/> 19. 16 and 17 and 18<br/> <br/> 20. limit 19 to english<br/> <br/> 21. limit 20 to last 12 years</p>                          | <p>16. 1 or 2 or 3 or 4 or 5 or 6<br/> 17. 7 or 8 or 9<br/> 18. 11 or 12 or 13 or 14 or 15<br/> 19. 16 and 17 and 18<br/> <br/> 20. limit 19 to english<br/> <br/> 21. limit 20 to last 12 years</p>                                                        | <p>English/2008-2020</p>                                                                                                                                         | <p>English/2008-2020</p>                                                                                                                                                                                                                                                                                                                                                                                        |
